# Supplementary material for: REEP6 mediates trafficking of a subset of Clathrin-coated vesicles and is critical for rod photoreceptor function and survival
Source: PubMed Central journal article supplement — Hum Mol Genet. 2017 Mar 23;26(12):2218–30. doi: 10.1093/hmg/ddx111 (PMC5458339; doi:10.1093/hmg/ddx111), 2017-03-23
Supplement: ddx111_Supp.pdf [file ddx111_Supp.pdf]

## Supplementary Material

### Supplementary Figure Legends

**Figure S1:** Histogram showing amplitudes of dark-adapted (scotopic) a- (**A**) and b- (**B**) wave (corresponding to rod function) and light-adapted (photopic) b-wave (**C**) (corresponding to cone function) from the retina of 1, 3, 6, 9 and 18-month old wild type (WT) (Blue), *Reep6*<sup>+/-</sup> (Red), and *Reep6*<sup>-/-</sup> mice.

**Figure S2:** RNA-seq analysis of *Reep6*<sup>-/-</sup> retina. (**A**) Principal component analysis (PCA) of the expressed genes from postnatal (PN) day 9 and 21 WT and *Reep6*<sup>-/-</sup> retina. (**B**) Heatmap showing hierarchical clustering of significantly differentially expressed (DE) genes at PN21. (**C**) Significantly DE genes related to positive regulation of immune response gene ontology (GO:0050778). (**D**) Significantly DE genes relating to the response to oxygen-containing compound gene ontology (GO:1901700).

**Figure S3:** Fundus images of the two Chinese RP patients with *REEP6* mutation.

**Figure S4:** Control images of adult mouse retina immunostained with anti-REEP6 (green) and anti-Clathrin (red) antibodies. Note that the green and red channels in the middle and right panels do not show any bleed-through. On the left is a merged image showing co-localization of REEP6 and Clathrin.

**A****Dark-adapted a-wave**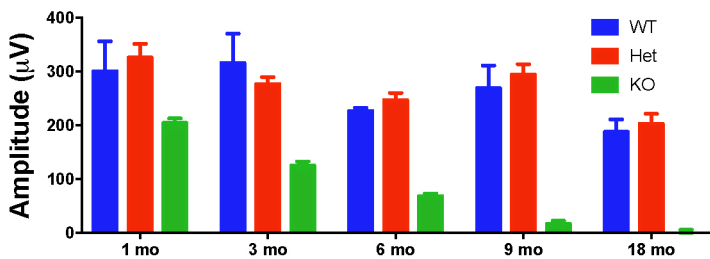**B****Dark-adapted b-wave**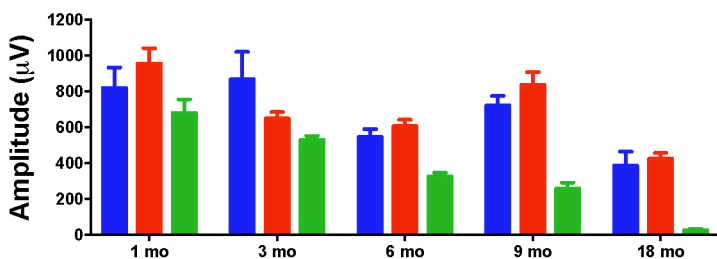**C****Light-adapted b-wave**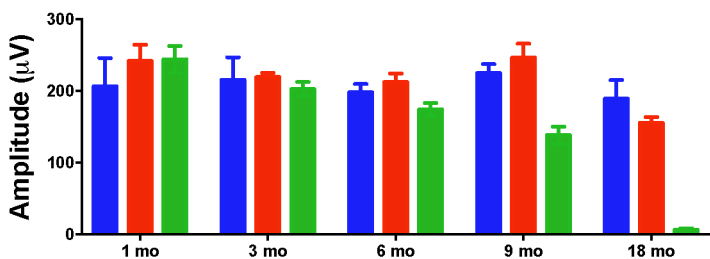**Figure S1**



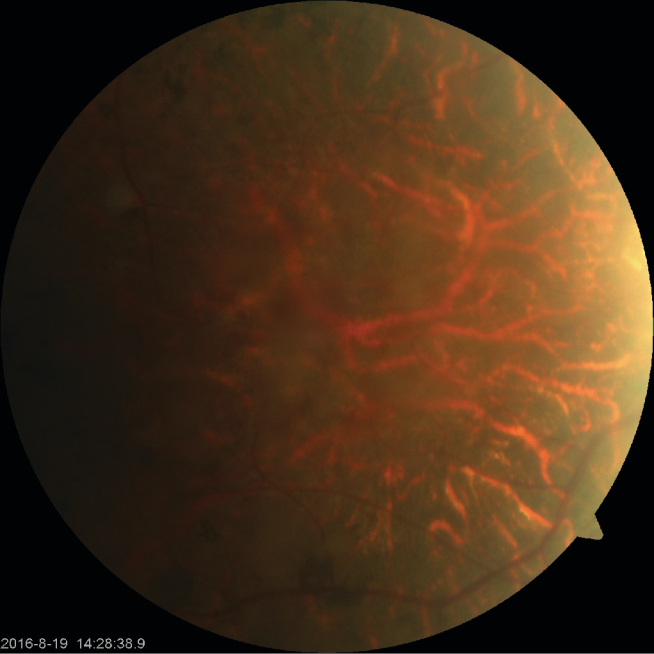

2016-8-19 14:28:38.9

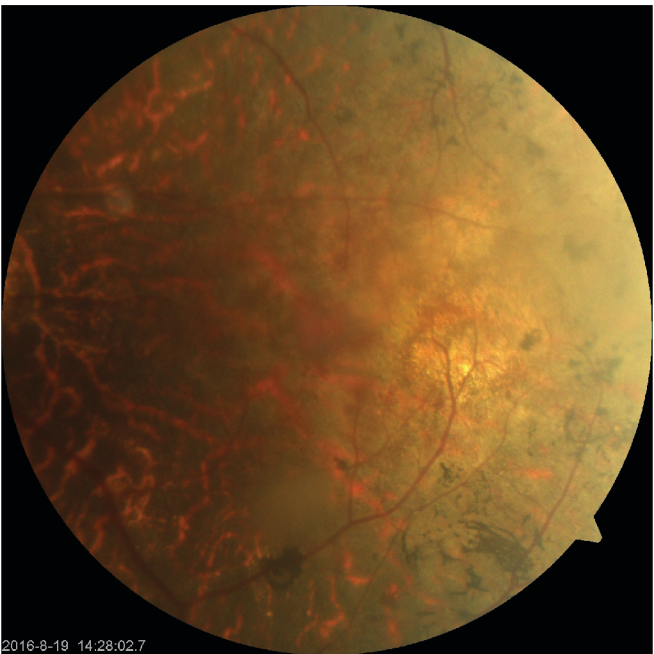

2016-8-19 14:28:02.7

Figure S3

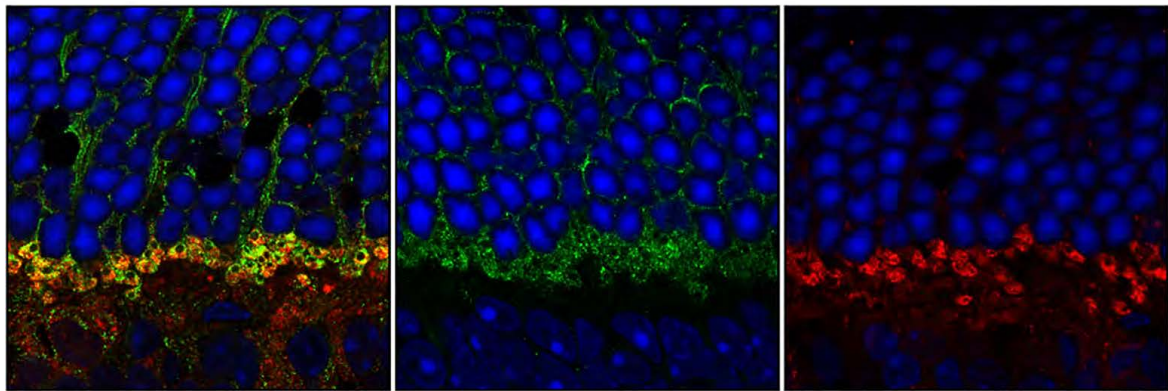

**Figure S4**

**Table S1:** Differentially expressed genes comparing PN9 *Reep6*<sup>-/-</sup> (KO) to WT retina. Listed are averages of count per million (CPM) values for each time point, the fold change, and associated adjusted P-value.

| <b>Gene Symbol</b> | <b>P9.WT</b> | <b>P9.KO</b> | <b>P21.WT</b> | <b>P21.KO</b> | <b>Fold Change</b> | <b>Adj P-value</b> |
|--------------------|--------------|--------------|---------------|---------------|--------------------|--------------------|
| Tdg                | 193.6        | 57.3         | 85.8          | 28.8          | -3.39              | 2.00E-04           |
| Tdg-ps             | 0.1          | 25.1         | 0.1           | 9.5           | 169.56             | 2.00E-04           |
| Gm9855             | 0            | 41.2         | 0.1           | 14.9          | 1074.54            | 2.00E-04           |
| Rpl30-ps9          | 0            | 1.3          | 0             | 0             | 76.27              | 2.00E-04           |
| Rtkn2              | 2.6          | 26.1         | 3.4           | 68.4          | 9.82               | 2.00E-04           |
| Gm15210            | 0            | 2.1          | 0.2           | 0             | 111.4              | 0.0012             |
| Gm7993             | 0.3          | 5.2          | 4.6           | 3.7           | 14.89              | 0.0012             |
| Gm9493             | 40.1         | 9.7          | 4             | 4.3           | -4.12              | 0.0016             |
| Gm13304            | 0            | 2.4          | 0             | 0             | 123.86             | 0.0024             |
| Speer5-ps1         | 0            | 1.4          | 0.7           | 0.9           | 46.21              | 0.0024             |
| Prima1             | 3            | 0.5          | 5.3           | 4.6           | -5.5               | 0.0116             |
| Reep6              | 113.7        | 50.3         | 589.5         | 200.4         | -2.28              | 0.0219             |
| Dffa               | 38.6         | 19.3         | 38.1          | 37.3          | -2.01              | 0.022              |
| Plk5               | 93.9         | 46.5         | 104.6         | 58.8          | -2.03              | 0.022              |
| A930033H14Rik      | 2            | 8            | 44.2          | 67.6          | 4.02               | 0.022              |
| Gm6639             | 0.2          | 1.2          | 1.1           | 1.2           | 5.98               | 0.0223             |
| Gm15920            | 1.7          | 18.7         | 1.6           | 12.1          | 13.44              | 0.0237             |
| Amd2               | 2.6          | 13.8         | 13.4          | 18.6          | 5.47               | 0.0244             |
| A730036I17Rik      | 0.7          | 3            | 3.5           | 3.9           | 4.09               | 0.0362             |
| 2610005L07Rik      | 293.4        | 177          | 125.9         | 120.8         | -1.66              | 0.0362             |
| Gm10575            | 0.1          | 2.9          | 0.8           | 0.8           | 29.67              | 0.0362             |
| Zfp433             | 59.5         | 33.7         | 41.5          | 26.9          | -1.77              | 0.0362             |
| Ndufa12            | 50.2         | 28.2         | 29.9          | 16.1          | -1.78              | 0.0375             |

**Table S2A:** Differentially expressed genes comparing PN21 *Reep6*<sup>-/-</sup> (KO) to WT retina.

Listed are averages of count per million (CPM) values for each time point, the fold change, and associated adjusted P-value.

| <b>Gene Symbol</b> | <b>P9.WT</b> | <b>P9.KO</b> | <b>P21.WT</b> | <b>P21.KO</b> | <b>Fold Change</b> | <b>Adj P-value</b> |
|--------------------|--------------|--------------|---------------|---------------|--------------------|--------------------|
| Pcsk4              | 18.2         | 25.7         | 10.5          | 143.9         | 13.8               | 0.001              |
| Gfap               | 21.2         | 14.7         | 13.3          | 93.9          | 7.12               | 0.001              |
| Pcolce             | 4.2          | 3.8          | 6.2           | 65.4          | 10.64              | 0.001              |
| Lrrc2              | 5.2          | 5.5          | 31.4          | 149.6         | 4.82               | 0.001              |
| Rtkn2              | 2.6          | 26.1         | 3.4           | 68.4          | 20.52              | 0.001              |
| Fgf2               | 9.9          | 14.1         | 53.2          | 411.5         | 7.78               | 0.0012             |
| Gm15983            | 1.7          | 1.6          | 21.3          | 116.7         | 5.52               | 0.002              |
| A2m                | 7.6          | 7            | 12.8          | 61.9          | 4.89               | 0.0021             |
| Gm12802            | 22.6         | 27.7         | 2.1           | 30.2          | 14.63              | 0.0023             |
| Reep6              | 113.7        | 50.3         | 589.5         | 200.4         | -2.91              | 0.0023             |
| Ccnd2              | 2.6          | 28.6         | 3.2           | 28.1          | 8.74               | 0.0027             |
| Slc25a37           | 35.2         | 37.7         | 50.3          | 150.7         | 3.03               | 0.0032             |
| Mt2                | 6.8          | 7.6          | 11.6          | 46.5          | 4.06               | 0.0033             |
| Tdg                | 193.6        | 57.3         | 85.8          | 28.8          | -2.94              | 0.0033             |
| Rnf144b            | 28.2         | 31.7         | 32.9          | 100           | 3.08               | 0.0033             |
| Klhl29             | 70.3         | 57.9         | 33.9          | 92.7          | 2.77               | 0.0052             |
| Antxr2             | 8.4          | 7.8          | 10.6          | 47.9          | 4.55               | 0.0052             |
| Scube1             | 4.7          | 4.2          | 0.8           | 11            | 14.09              | 0.0064             |
| Myo10              | 121.7        | 123.3        | 85.6          | 230.5         | 2.72               | 0.0064             |
| Rfx2               | 3.4          | 4.4          | 5.3           | 25.7          | 4.9                | 0.0064             |
| Arhgap27           | 2            | 10.6         | 4             | 20.6          | 5.18               | 0.0064             |
| Prss36             | 3.1          | 6.8          | 3.1           | 23.6          | 7.64               | 0.0064             |
| Agtpbp1            | 147          | 176          | 304.5         | 693.9         | 2.3                | 0.009              |
| Gnb3               | 299.7        | 299.2        | 307.7         | 668.7         | 2.2                | 0.009              |
| Tnfrsf1a           | 5.4          | 4.5          | 3.7           | 16.7          | 4.56               | 0.009              |
| Ttc7               | 5.5          | 6.2          | 4.2           | 18.2          | 4.4                | 0.009              |
| E2f6               | 14.8         | 16.9         | 18.7          | 48.8          | 2.64               | 0.009              |
| Sec22c             | 57           | 51.1         | 109           | 260.4         | 2.41               | 0.009              |
| Gm15920            | 1.7          | 18.7         | 1.6           | 12.1          | 7.41               | 0.009              |
| Btc                | 3.6          | 3.1          | 6             | 26.4          | 4.45               | 0.009              |
| Gm20425            | 0.6          | 2            | 0             | 9.9           | 154.9              | 0.009              |
| Serping1           | 3.2          | 2.8          | 4.3           | 18.1          | 4.28               | 0.0093             |
| Fras1              | 12.5         | 12.2         | 8.7           | 37.5          | 4.32               | 0.0103             |
| Nr4a1              | 8.2          | 9.6          | 24.7          | 59            | 2.42               | 0.0104             |
| Pbxip1             | 27.3         | 29           | 33.6          | 76.5          | 2.3                | 0.0126             |
| Osmr               | 4            | 4.6          | 9.3           | 26.9          | 2.91               | 0.0128             |
| Zfyve28            | 15.1         | 18.3         | 70.1          | 141.3         | 2.04               | 0.0128             |

|               |       |       |       |       |        |        |
|---------------|-------|-------|-------|-------|--------|--------|
| Dnttip2       | 119.5 | 113.3 | 58.3  | 119.7 | 2.08   | 0.0129 |
| Stat3         | 82.1  | 72.6  | 79.5  | 229.4 | 2.9    | 0.0132 |
| Ipo5          | 217   | 212.8 | 160.1 | 305   | 1.93   | 0.0132 |
| Mt1           | 10.6  | 13.3  | 30.1  | 73.7  | 2.47   | 0.0132 |
| Jak3          | 1.1   | 1.4   | 1.5   | 9.3   | 6.11   | 0.0132 |
| Socs3         | 2.6   | 2.1   | 2.3   | 12    | 5.21   | 0.0132 |
| Cisd3         | 20.2  | 16.3  | 10.1  | 27    | 2.71   | 0.0132 |
| Gm26690       | 1.3   | 0.9   | 0.9   | 0     | -52.56 | 0.0132 |
| Notch1        | 92.9  | 66.4  | 52    | 102.1 | 1.99   | 0.0157 |
| Gm20680       | 1.5   | 0.8   | 0.8   | 0     | -46.46 | 0.0157 |
| Snora16a      | 0.8   | 1.7   | 0     | 2.1   | 124.93 | 0.0163 |
| Fam3c         | 96.6  | 95.4  | 293.6 | 157.2 | -1.85  | 0.0169 |
| Muc2          | 7.8   | 10.9  | 2.2   | 8.9   | 4.02   | 0.0259 |
| Mest          | 45.7  | 50    | 62.3  | 115.5 | 1.88   | 0.0259 |
| Mir6236       | 39    | 47.3  | 35.2  | 67.5  | 1.94   | 0.0259 |
| Gm3020        | 2.1   | 1.7   | 2.8   | 0.4   | -7.05  | 0.0268 |
| Tnip2         | 17.4  | 15.2  | 23.8  | 48.9  | 2.07   | 0.0272 |
| Oasl2         | 0.9   | 4.1   | 4.5   | 15.8  | 3.52   | 0.0274 |
| Gm10030       | 1.2   | 0.8   | 9.8   | 31.3  | 3.2    | 0.0295 |
| Nupr1         | 0.9   | 0.9   | 2.2   | 8.4   | 3.82   | 0.03   |
| B2m           | 11.9  | 13.7  | 14    | 45    | 3.21   | 0.03   |
| Crym          | 122.9 | 117.2 | 31.7  | 62.6  | 1.99   | 0.0306 |
| Zfp781        | 2.1   | 2.8   | 5.5   | 1.4   | -3.74  | 0.0306 |
| Pdlim3        | 2.5   | 2.2   | 4.3   | 12.7  | 3.01   | 0.0315 |
| Gm14409       | 0.7   | 0.4   | 0     | 1.2   | 72.75  | 0.0315 |
| Kremen1       | 27    | 26.1  | 29.7  | 55.4  | 1.89   | 0.0327 |
| 6430562O15Rik | 2.1   | 1.8   | 30.1  | 55.8  | 1.88   | 0.0327 |
| Myo5b         | 15.8  | 15    | 35.9  | 68.4  | 1.93   | 0.0339 |
| Pmvk          | 13.5  | 15    | 24.8  | 46.7  | 1.9    | 0.0363 |
| Junb          | 1.6   | 2.1   | 2.9   | 11.3  | 3.96   | 0.0379 |
| Ttc28         | 63.6  | 67.6  | 34.7  | 65.4  | 1.91   | 0.039  |
| Slc15a4       | 50.4  | 40.8  | 22.3  | 54.2  | 2.44   | 0.0413 |
| Glb1l3        | 2.5   | 2.6   | 7     | 2.2   | -3.05  | 0.0413 |
| Ikzf2         | 12.3  | 13.3  | 55.1  | 30.1  | -1.81  | 0.0422 |
| Itga4         | 85.7  | 106.1 | 143   | 256.2 | 1.81   | 0.0422 |
| Cerkl         | 39.6  | 46.4  | 58.9  | 111.7 | 1.91   | 0.0446 |
| Ahr           | 38.5  | 43.8  | 64.1  | 115.4 | 1.82   | 0.0467 |
| Tnfaip3       | 20.1  | 26.2  | 299.8 | 179.7 | -1.65  | 0.0467 |
| Adamts1       | 7.4   | 7.9   | 27    | 53.2  | 1.99   | 0.0467 |
| Pros1         | 8.8   | 10    | 12.9  | 27.8  | 2.18   | 0.0467 |
| Rabgef1       | 45.2  | 49    | 420.8 | 244.2 | -1.71  | 0.0467 |
| Knstrn        | 1.2   | 1.4   | 12.1  | 3.9   | -3.11  | 0.0467 |
| Arap1         | 42.6  | 47.2  | 12.7  | 29.8  | 2.37   | 0.0467 |



|               |       |       |        |       |       |        |
|---------------|-------|-------|--------|-------|-------|--------|
| Lrrk2         | 6.4   | 7.8   | 9.7    | 21.5  | 2.24  | 0.0467 |
| C1qb          | 6.5   | 6.8   | 2.8    | 8.4   | 3.03  | 0.0467 |
| Nrl           | 775.5 | 815.7 | 1194.9 | 744.5 | -1.59 | 0.0467 |
| Spidr         | 1.7   | 1.6   | 5      | 12.9  | 2.6   | 0.0467 |
| Gm4792        | 17.3  | 9.5   | 91.7   | 52.2  | -1.74 | 0.0467 |
| AA474408      | 23.2  | 24.5  | 16.5   | 34.6  | 2.12  | 0.0467 |
| Gm15513       | 2.6   | 2.8   | 10.7   | 22.8  | 2.14  | 0.0467 |
| AY036118      | 116.7 | 130.5 | 91.3   | 193.2 | 2.13  | 0.0467 |
| lrf7          | 1.5   | 3.2   | 7.8    | 17.2  | 2.24  | 0.049  |
| 2810032G03Rik | 2.4   | 2.1   | 1.3    | 5.1   | 3.84  | 0.049  |
| Ctss          | 11.6  | 12.5  | 9.3    | 22.4  | 2.43  | 0.049  |
| Prrt2         | 93.1  | 90    | 94.9   | 152.9 | 1.63  | 0.049  |
| Pcdh19        | 37.9  | 39    | 21.7   | 39.8  | 1.85  | 0.049  |
| 1700071M16Rik | 4.9   | 5     | 17.4   | 8.4   | -2.05 | 0.049  |

**Table S2B:** Enrichment of biological process gene ontologies for the PN21 differentially expressed genes. Listed are end-of-branch terms and their significance values.

| <b>GO Term</b> | <b>Description</b>                                           | <b>Ontology</b> | <b>Genes in Ont</b> | <b>DE Genes</b> | <b>P-value</b> | <b>FDR</b> |
|----------------|--------------------------------------------------------------|-----------------|---------------------|-----------------|----------------|------------|
| GO:0032102     | negative regulation of response to external stimulus         | BP              | 210                 | 9               | 1.63E-06       | 0.0042     |
| GO:1903035     | negative regulation of response to wounding                  | BP              | 108                 | 7               | 1.65E-06       | 0.0021     |
| GO:0019221     | cytokine-mediated signaling pathway                          | BP              | 199                 | 8               | 1.03E-05       | 0.0053     |
| GO:0031348     | negative regulation of defense response                      | BP              | 109                 | 6               | 2.43E-05       | 0.0090     |
| GO:0050778     | positive regulation of immune response                       | BP              | 297                 | 9               | 2.69E-05       | 0.0087     |
| GO:0001869     | negative regulation of complement activation, lectin pathway | BP              | 2                   | 2               | 2.79E-05       | 0.0072     |
| GO:0060548     | negative regulation of cell death                            | BP              | 740                 | 14              | 3.03E-05       | 0.0071     |
| GO:1901700     | response to oxygen-containing compound                       | BP              | 857                 | 15              | 3.73E-05       | 0.0080     |
| GO:0050727     | regulation of inflammatory response                          | BP              | 176                 | 7               | 4.08E-05       | 0.0081     |
| GO:0006959     | humoral immune response                                      | BP              | 73                  | 5               | 4.22E-05       | 0.0078     |
| GO:0002698     | negative regulation of immune effector process               | BP              | 78                  | 5               | 5.81E-05       | 0.0094     |

**Table S3:** Expression, fold change, and adjusted P-value for the rod and cone signal transduction pathway genes that are differentially expressed at PN21.

| Gene Symbol                | P9.WT  | P9.KO  | P21.WT  | P21.KO  | Fold Change | Adj P-value |
|----------------------------|--------|--------|---------|---------|-------------|-------------|
| <b>Rod Genes</b>           |        |        |         |         |             |             |
| Rho                        | 3045   | 4047.2 | 33264.1 | 22643.4 | -1.45       | 0.127       |
| Gnat1                      | 173.2  | 278    | 8913.8  | 6670    | -1.32       | 0.224       |
| Gnb1                       | 3321.5 | 3354.9 | 5279.3  | 3512.1  | -1.49       | 0.07        |
| Gngt1                      | 147.3  | 178.2  | 717.8   | 530.4   | -1.34       | 0.194       |
| Pde6a                      | 64.7   | 106.8  | 2345.9  | 1902.1  | -1.22       | 0.321       |
| Pde6b                      | 913.2  | 1066   | 2304    | 1496.1  | -1.52       | 0.06        |
| Pde6g                      | 280.1  | 336    | 1436    | 1045    | -1.36       | 0.136       |
| Cnga1                      | 1849.8 | 2202.8 | 3396.3  | 2363    | -1.42       | 0.136       |
| Cngb1                      | 536.2  | 579.6  | 757.3   | 585.5   | -1.28       | 0.22        |
| Slc24a1                    | 59     | 102.6  | 1506.1  | 1101.4  | -1.35       | 0.136       |
| Guca1a                     | 19.9   | 22.2   | 302     | 250.6   | -1.19       | 0.435       |
| Guca1b                     | 9.2    | 18     | 875.9   | 653.4   | -1.33       | 0.195       |
| Gucy2f                     | 96.3   | 112.2  | 401.7   | 264.3   | -1.51       | 0.126       |
| <b>Cone Genes</b>          |        |        |         |         |             |             |
| Opn1sw                     | 159.2  | 192.2  | 439.5   | 343.9   | -1.26       | 0.253       |
| Opn1mw                     | 1.9    | 5.1    | 167.7   | 183.3   | 1.11        | 0.684       |
| Gnat2                      | 37.6   | 46.7   | 216.9   | 186.8   | -1.15       | 0.551       |
| Gnb3                       | 299.7  | 299.2  | 307.7   | 668.7   | 2.2         | 0.009       |
| Gngt2                      | 83.3   | 59.5   | 48.6    | 43.2    | -1.11       | 0.717       |
| Pde6c                      | 47.1   | 51.8   | 166     | 161.9   | -1.01       | 0.969       |
| Pde6h                      | 139.3  | 148.9  | 503.8   | 408     | -1.22       | 0.351       |
| Slc24a2                    | 28     | 31.5   | 104.8   | 113.3   | 1.09        | 0.738       |
| Cnga3                      | 9.1    | 8.2    | 15.3    | 14.3    | -1.05       | 0.912       |
| Cngb3                      | 20.5   | 19.8   | 35.5    | 30.6    | -1.15       | 0.641       |
| Arr3                       | 12.8   | 11.5   | 311.8   | 287.5   | -1.07       | 0.792       |
| <b>Photoreceptor Genes</b> |        |        |         |         |             |             |
| Gnb5                       | 183    | 261.8  | 388.1   | 353.5   | -1.09       | 0.771       |
| Rgs9                       | 476.8  | 544.6  | 762     | 672     | -1.12       | 0.614       |
| Rgs9bp                     | 166.3  | 207.8  | 920.5   | 685.6   | -1.33       | 0.164       |
| Sag                        | 1790.1 | 2093.4 | 4864.8  | 3823.7  | -1.26       | 0.275       |
| Grk1                       | 175.9  | 254.9  | 2203.1  | 1952.3  | -1.12       | 0.634       |
| Rcvrn                      | 75.8   | 115.1  | 645.7   | 592.1   | -1.08       | 0.787       |

**Table S4A. The frequency of variant E75K in various databases.**

| Database | Allele | Frequency               |
|----------|--------|-------------------------|
| ExAC     | 8      | 6.654e-05<br>(8/120224) |
| ESP6500  | 2      | 0.0001538<br>(2/13004)  |
| 1000G    | 0      | 0                       |

**Table S4B. Population specific AMF of E75K rare variant in ExAC database**

| Population             | Allele count | Allele number | Number of homozygotes | AMF             |
|------------------------|--------------|---------------|-----------------------|-----------------|
| African                | 6            | 10296         | 0                     | 0.0005828       |
| East Asian             | 2            | 8638          | 0                     | 0.0002315       |
| European (Finnish)     | 0            | 6604          | 0                     | 0               |
| European (Non-Finnish) | 0            | 65746         | 0                     | 0               |
| Latino                 | 0            | 11544         | 0                     | 0               |
| Other                  | 0            | 896           | 0                     | 0               |
| South Asian            | 0            | 16500         | 0                     | 0               |
| <b>Total</b>           | <b>8</b>     | <b>120224</b> | <b>0</b>              | <b>6.65E-05</b> |

**Table S4C. Damage prediction of the variant E75K.**

| Software         | Score | Prediction        |
|------------------|-------|-------------------|
| Polyphen2_HDIV   | 1     | Probably damaging |
| Polyphen2_HVAR   | 0.992 | Probably damaging |
| MutationTaster   | 1     | Disease causing   |
| SIFT             | 0.2   | Tolerable         |
| LRT              | -     | -                 |
| MutationAssessor | 2.27  | Medium            |
| FATHMM           | -3.13 | Damaging          |
| RadialSVM        | -0.14 | Tolerable         |
| LR               | 0.393 | Tolerable         |
| VEST3            | 0.799 | Damaging          |
| CADD             | 21.4  | Damaging          |
| GERP++           | 4.53  | Conserved         |
| phyloP100way     | 9.668 | Conserved         |
| SiPhy_29way      | 16.28 | Conserved         |
